# Supplementary material for: MOF-derived manganese oxide/carbon nanocomposites with raised capacitance for stable asymmetric supercapacitor
Source: Royal Society of Chemistry journal article supplement (doi:10.1039/d0ra05494a), 2020-01-01
Supplement: d0ra05494a1.pdf [file d0ra05494a1.pdf]

## Supplementary Information

### MOF-derived Manganese Oxide/Carbon Nanocomposites with Raised Capacitance for Stable Asymmetric Supercapacitor

*By Ruoyu Wang, Yating Hu, Zhenghui Pan,\* John Wang,\**

*Email: [msepz@nus.edu.sg](mailto:msepz@nus.edu.sg); [msewangj@nus.edu.sg](mailto:msewangj@nus.edu.sg)*

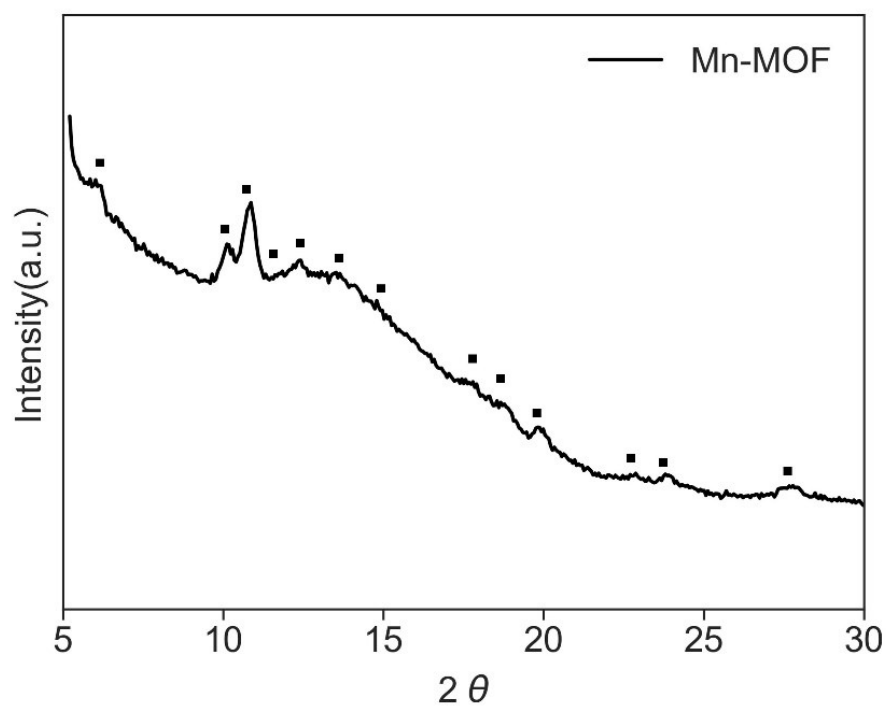

Figure S1. The XRD of as synthesized Mn-MIL-100.

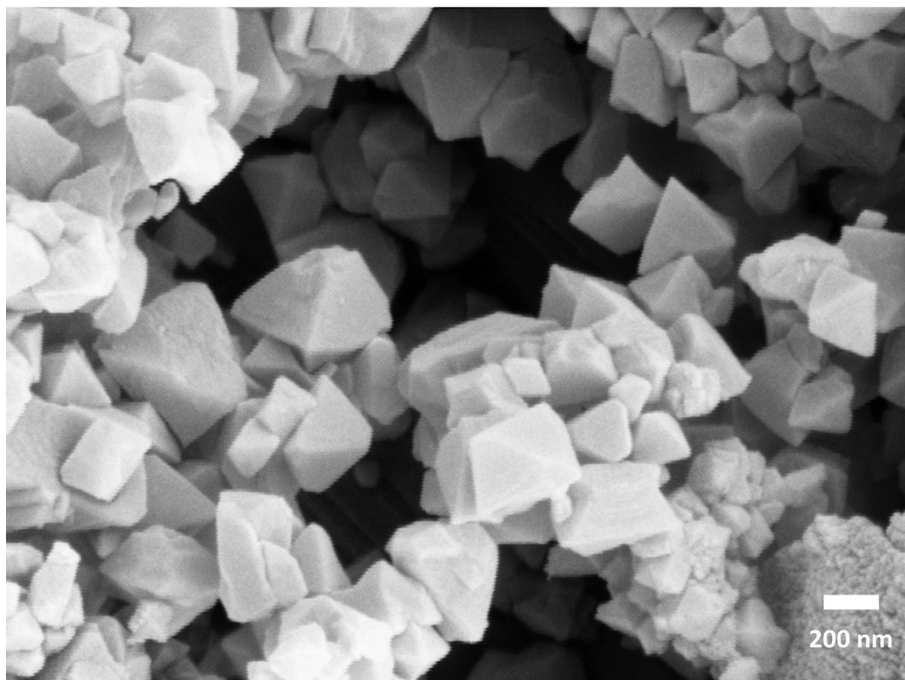

Figure S2. The SEM image of Mn-MIL-100 MOF.

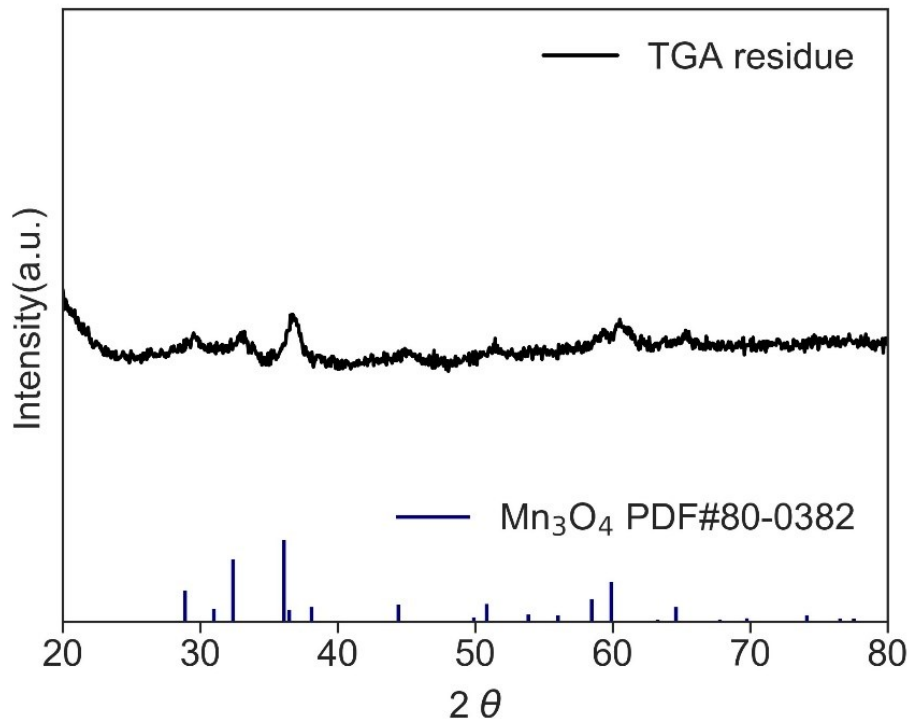

Figure S3. The residue of TGA on MnO@C XRD of is found to be Mn<sub>3</sub>O<sub>4</sub>.

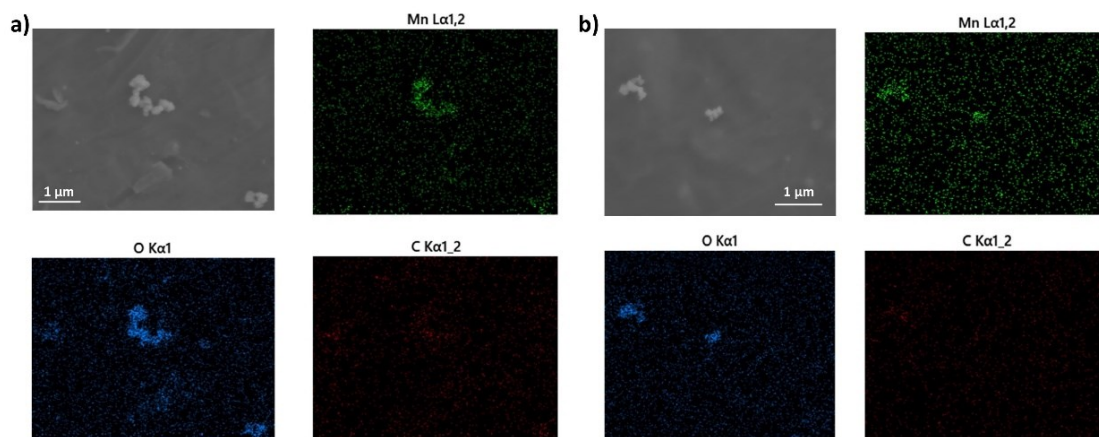

Figure S4. EDS mapping of (a)  $\text{Mn}_3\text{O}_4$ -300 and (b)  $\text{Mn}_2\text{O}_3$ -400.

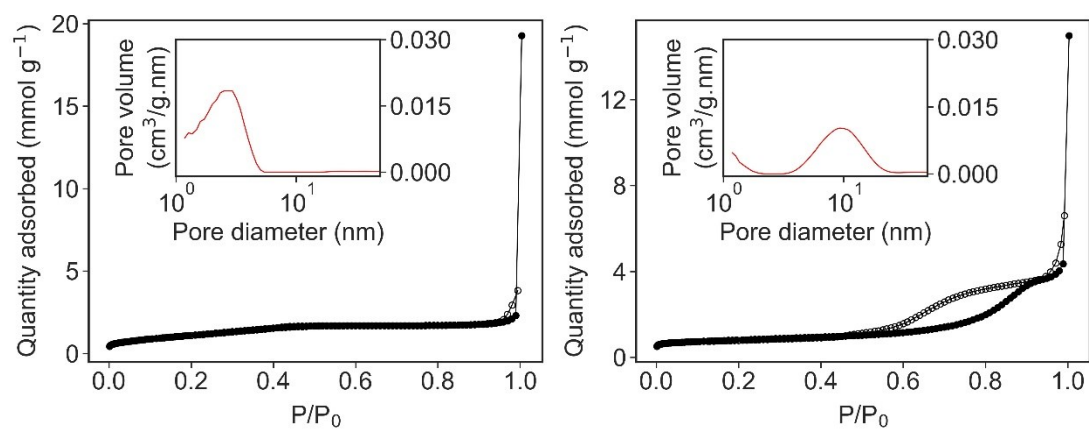

Figure S5. The N<sub>2</sub> isotherm and DFT pore distribution of (a) Mn<sub>3</sub>O<sub>4</sub>-300 and (b) Mn<sub>2</sub>O<sub>3</sub>-400, respectively.

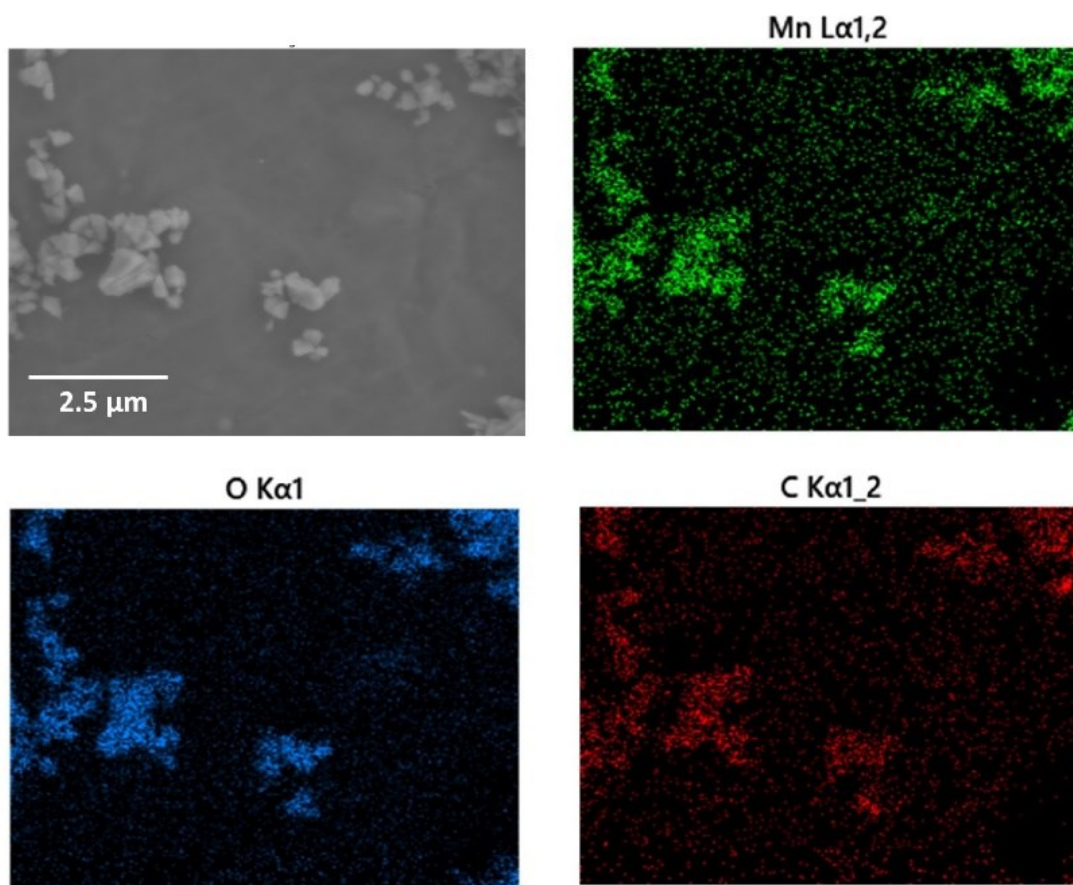

Figure S6. EDS mapping of Mn<sub>3</sub>O<sub>4</sub>@C-5h.

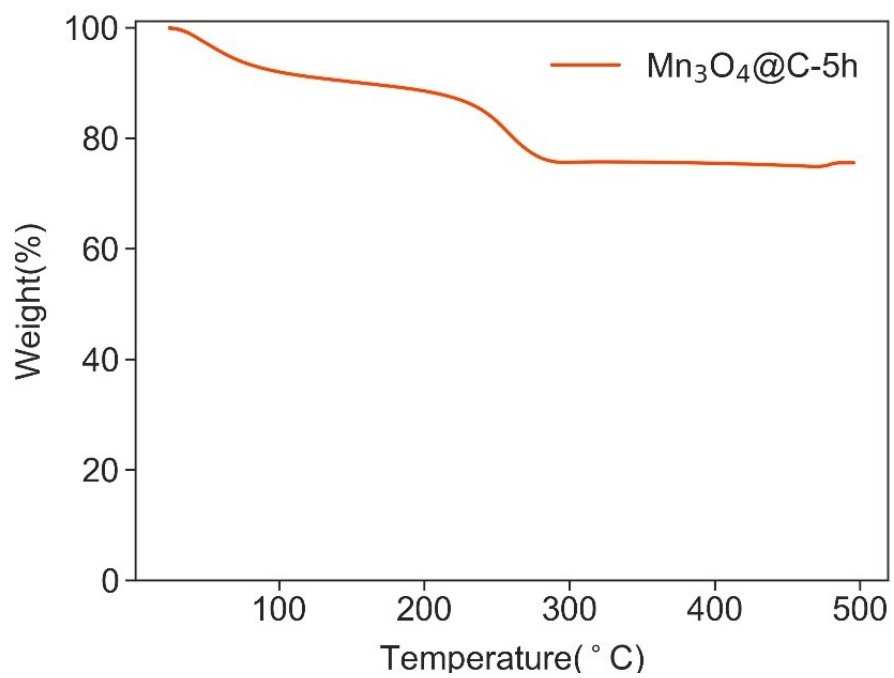

Figure S7. The TGA result of Mn<sub>3</sub>O<sub>4</sub>@C-5h.



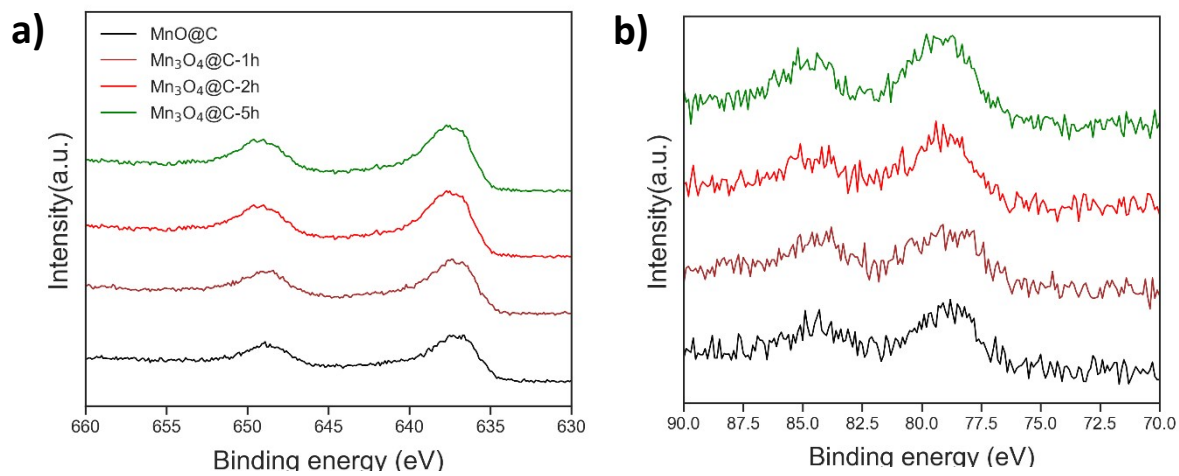

Figure S8. XPS spectroscopy for a) Mn 2p, and b) Mn 3s.

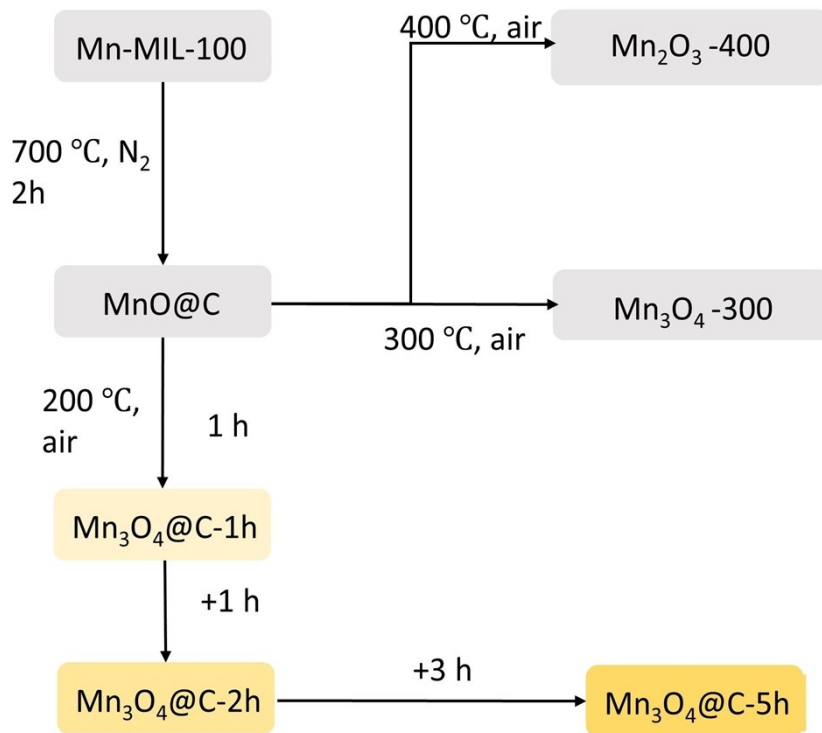

Figure S9. A summary on the thermolysis processes and their respective products involved in this chapter.

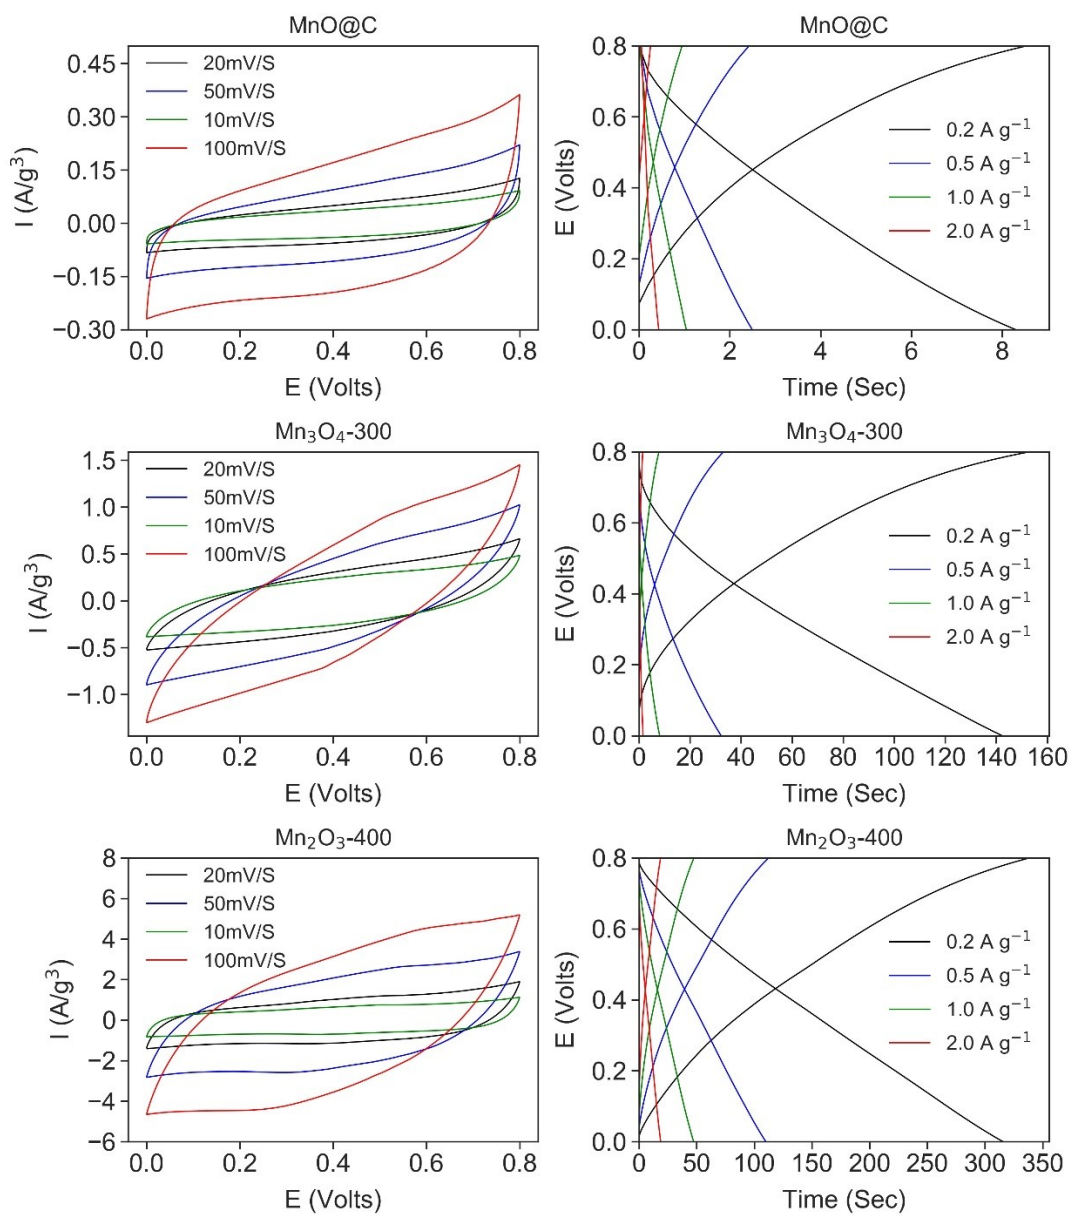

Figure S10. The CV and GCD patterns of MnO@C, Mn<sub>3</sub>O<sub>4</sub>-300 and Mn<sub>2</sub>O<sub>3</sub>-400, respectively.

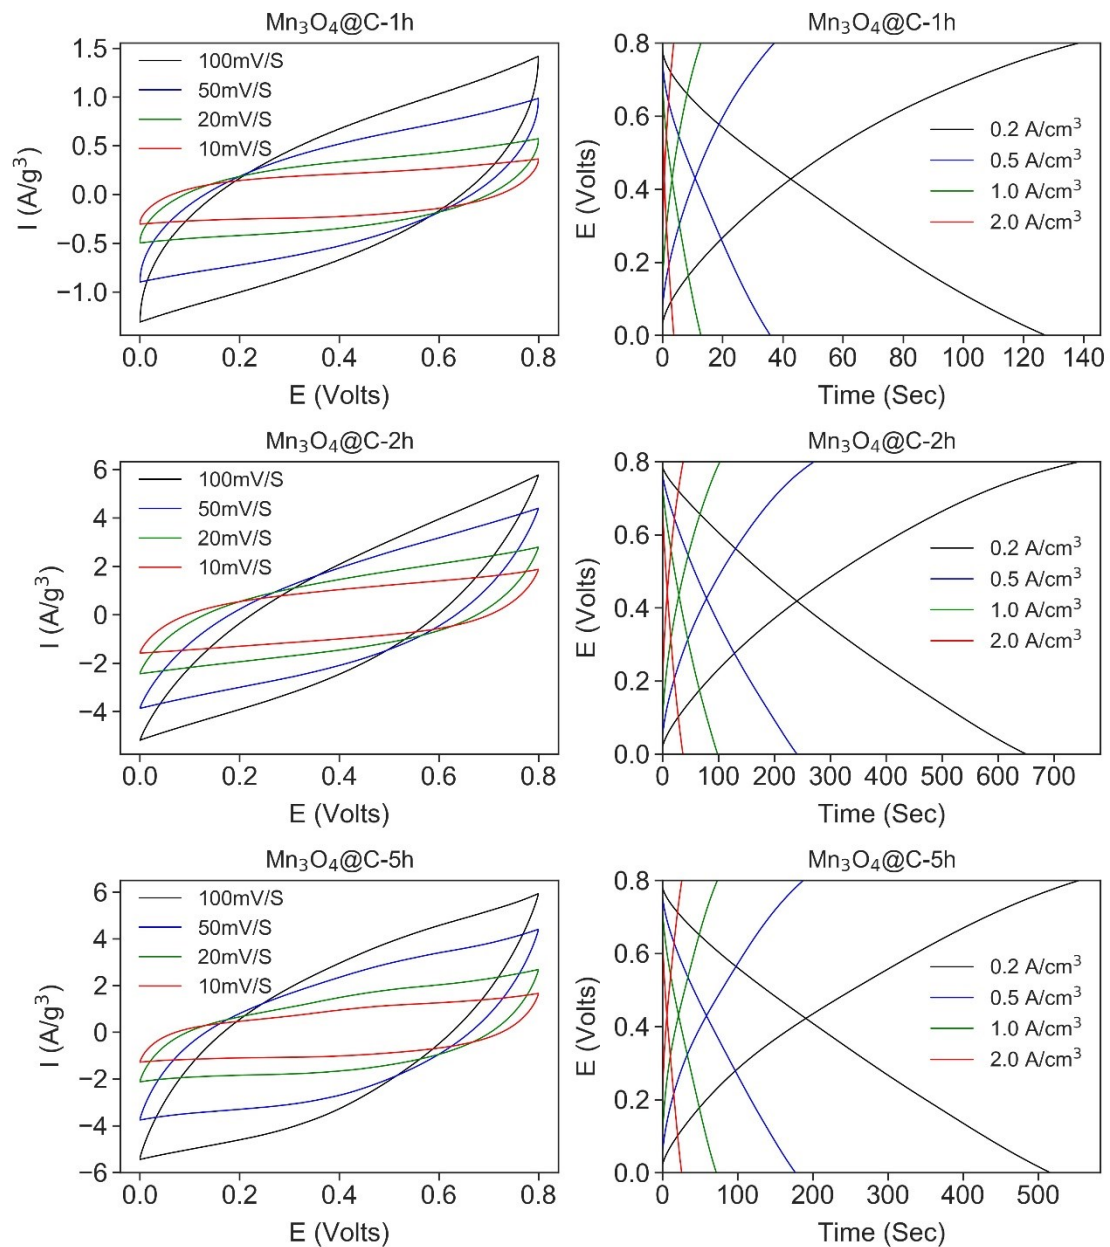

Figure S11. The CV and GCD patterns of  $\text{Mn}_3\text{O}_4@\text{C}$ -1h,  $\text{Mn}_3\text{O}_4@\text{C}$ -2h and  $\text{Mn}_3\text{O}_4@\text{C}$ -5h, respectively.

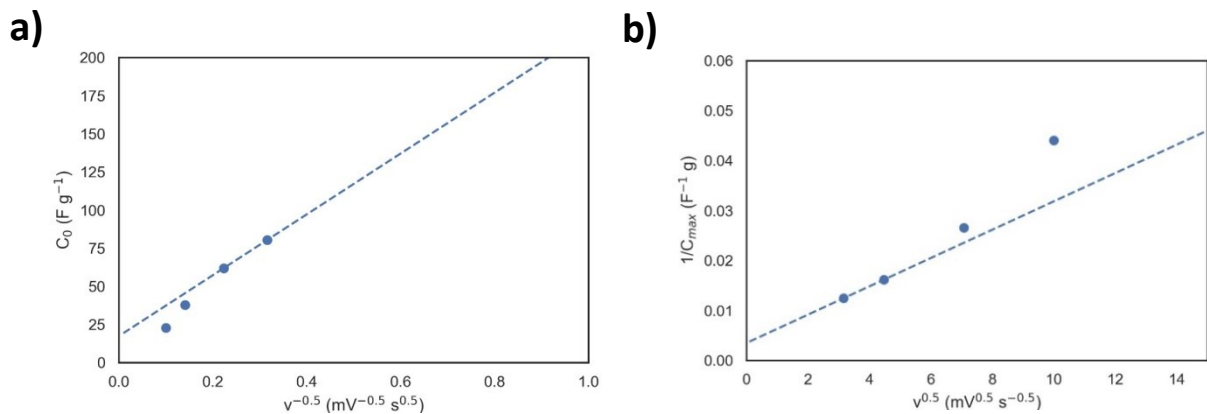

Figure S12. (a) double-layer capacitance  $C_0$ , and (b) maximum capacitance  $C_{\text{max}}$  of  $\text{Mn}_3\text{O}_4@\text{C}-2\text{h}$ .

The double-layer capacitance  $C_0$  and maximum capacitance  $C_{\text{max}}$  of  $\text{Mn}_3\text{O}_4@\text{C}-2\text{h}$  were estimated to be  $17.3 \text{ F g}^{-1}$  and  $285.7 \text{ F g}^{-1}$  respectively, by the Trassatti's method. The relative contribution of double-layer capacitance was thus within the region of  $\sim 10 \%$  ( $6.1 \%$ ). It is worth nothing that we only selected the two low frequency (i.e.,  $v = 10 \text{ mV/s}$  and  $20 \text{ mV/s}$ ) data points from the available data due to the obvious deviation from linear relationship when the scan rate increases as a result of the internal resistance.

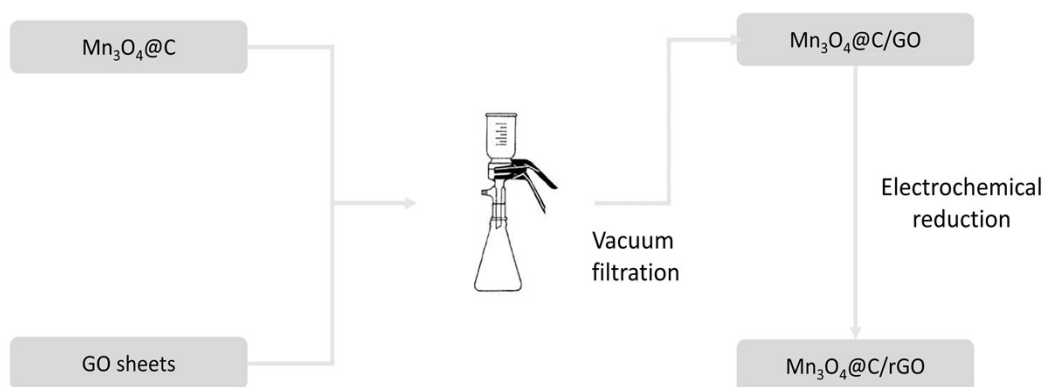

Figure S13. Schematic illustrating the manufacturing process of  $\text{Mn}_3\text{O}_4@\text{C}/\text{rGO}$  electrode.

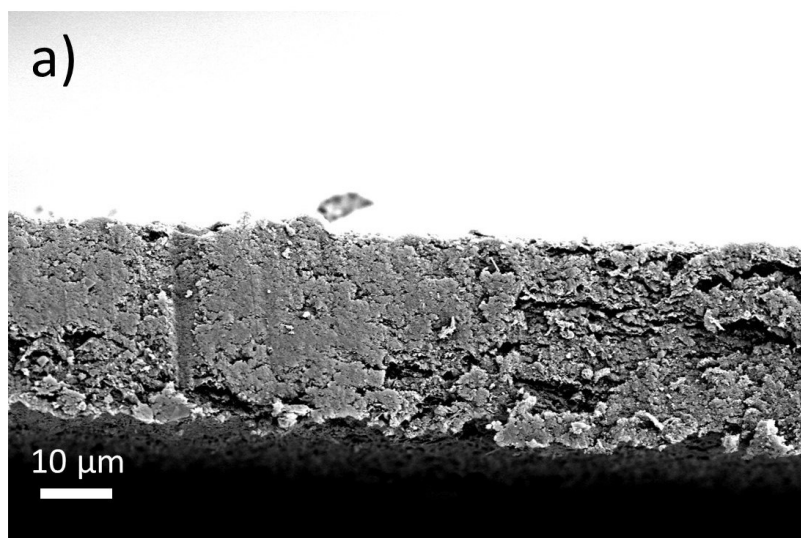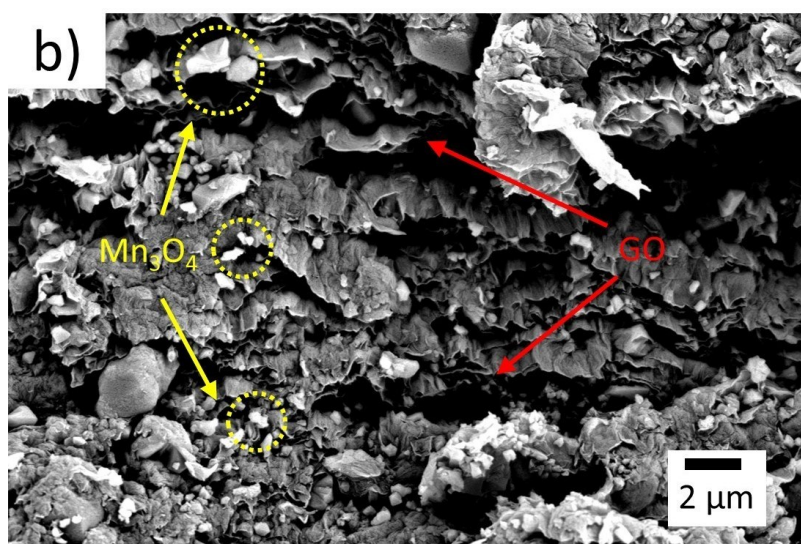

Figure S14. The cross-section SEM of Mn<sub>3</sub>O<sub>4</sub>@C/GO.

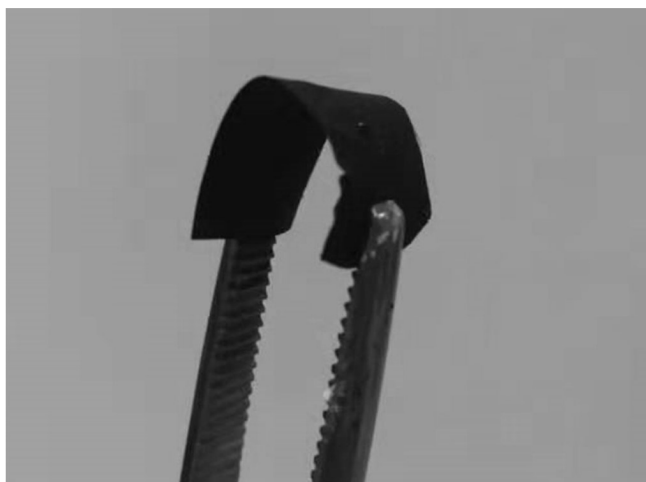

Figure S15. The demonstration of the flexibility of  $\text{Mn}_3\text{O}_4@\text{C}/\text{GO}$ .



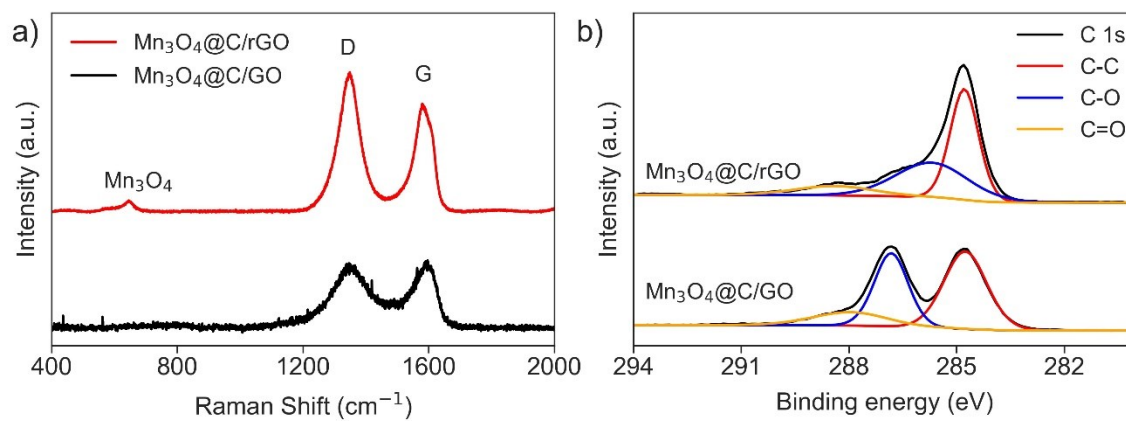

Figure S16. (a) Raman and (b) XPS analysis results of Mn<sub>3</sub>O<sub>4</sub>@C/GO and Mn<sub>3</sub>O<sub>4</sub>@C/rGO.

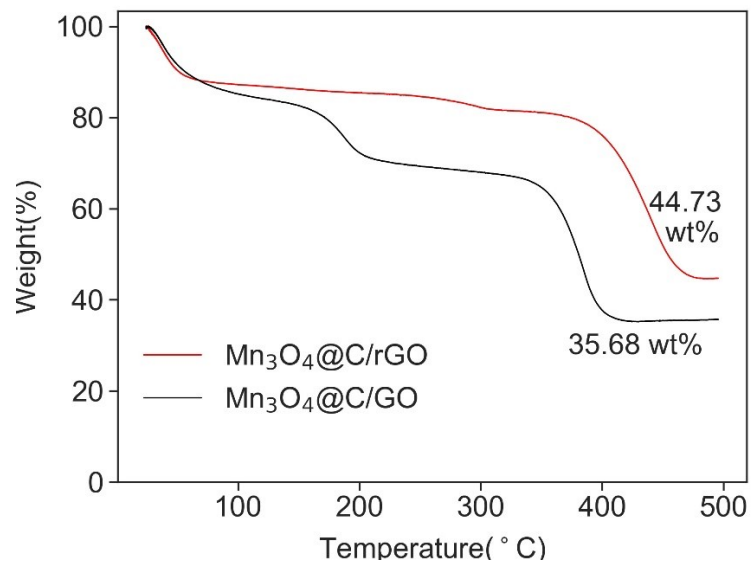

Figure S17. The TGA results of Mn<sub>3</sub>O<sub>4</sub>@C/GO and Mn<sub>3</sub>O<sub>4</sub>@C/rGO, respectively.

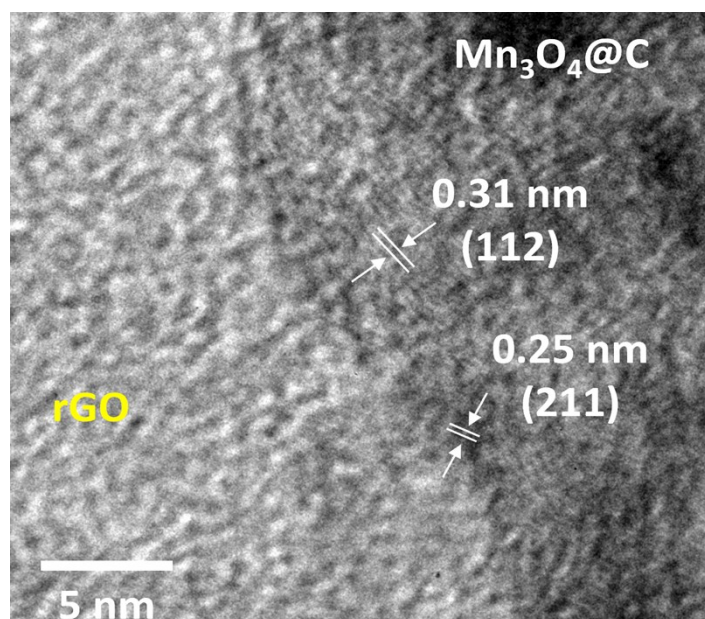

Figure S18. TEM of the Mn<sub>3</sub>O<sub>4</sub>@C/rGO.

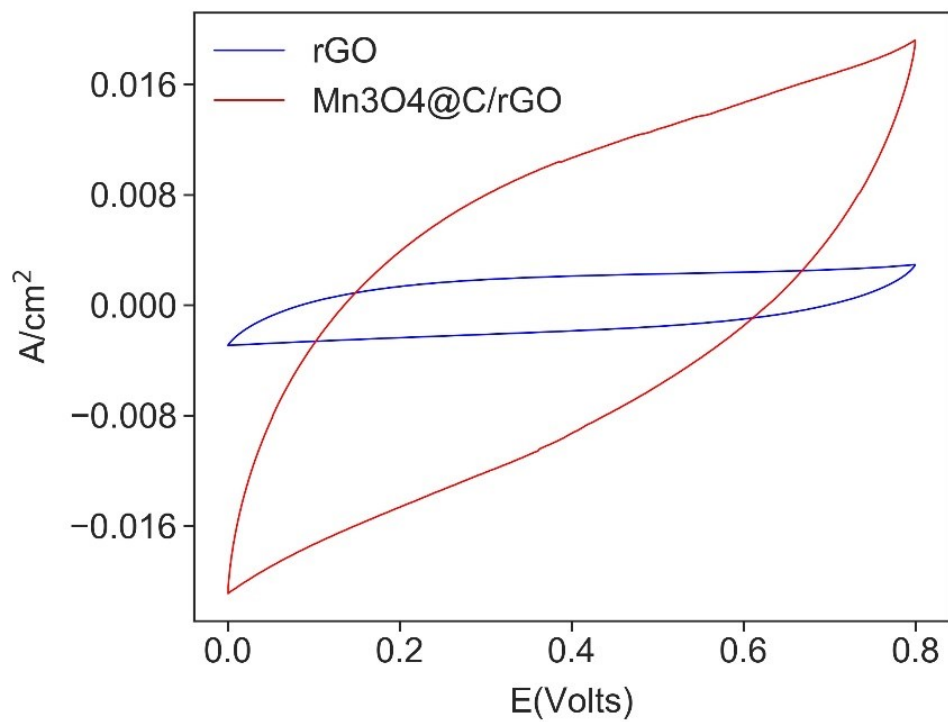

Figure S19. The CV pattern of Mn<sub>3</sub>O<sub>4</sub>@C/rGO and rGO.

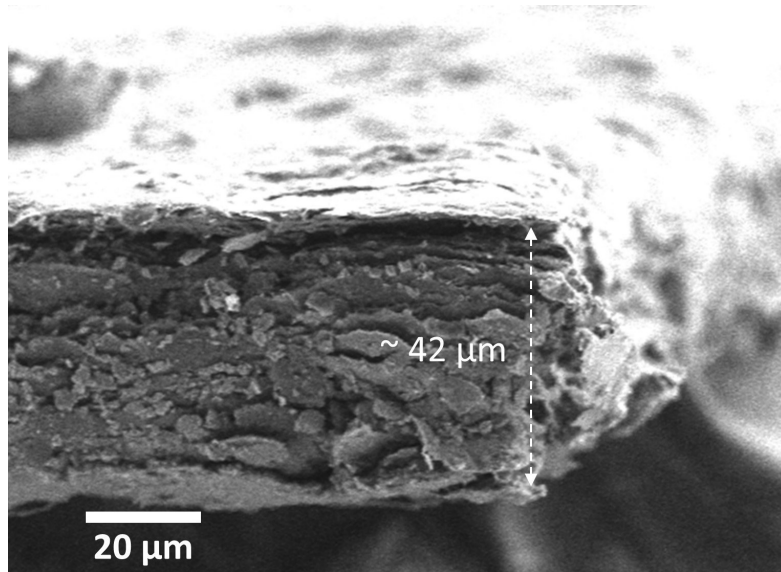

Figure S20. The cross-section SEM of CNT/rGO.

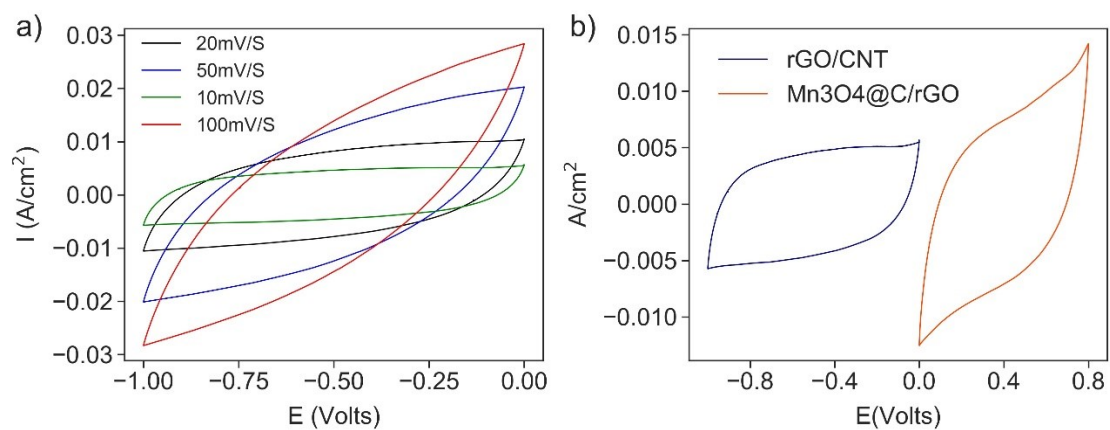

Figure S21. (a) CV patterns of the CNT/rGO paper electrode. (b) CV curves of CNT/rGO and Mn<sub>3</sub>O<sub>4</sub>@C/rGO, respectively, at 10 mV/s.
